# Supplementary material
Source: publisher figshare collection journal article supplement (https://acs.figshare.com/ndownloader/files/7544674)
Supplement: Supplementary file 1 [file 7544674]

# Supporting Information

## Performance Comparison of Systematic Methods for Rigorous

### Definition of Coarse-Grained Sites of Large Biomolecules

Yuwei Zhang,<sup>†,‡</sup> Zexing Cao,<sup>†</sup> John Zenghui Zhang,<sup>‡,§</sup> Fei Xia<sup>\*,‡,§</sup>

<sup>†</sup>*State Key Laboratory of Physical Chemistry of Solid Surfaces and Fujian Provincial Key Laboratory of Theoretical and Computational Chemistry, College of Chemistry and Chemistry Engineering, Xiamen University, Xiamen 361005, China*

<sup>‡</sup>*School of Chemistry and Molecular Engineering, East China Normal University, Shanghai 200062, China.*

<sup>§</sup>*NYU-ECNU Center for Computational Chemistry at NYU Shanghai, Shanghai 200062, China*

*\*Corresponding Author E-mail: fxia@chem.ecnu.edu.cn.*

#### Section S1. ANM Model

ANM is constructed by connecting the C $\alpha$  atoms in protein with harmonic springs. The potential of ANM is shown in Eq.(1) below:

$$V_{ANM} = \sum_i^M \sum_{j>i}^M \frac{k}{2} \cdot (r_{ij} - r_{ij}^0)^2 \cdot H(r_c - r_{ij}^0) \quad (1)$$

where  $M$  is the number of C $\alpha$  atoms,  $k$  and  $r_c$  are the uniform spring constant and cut-off distance,  $r_{ij}$  and  $r_{ij}^0$  are the instantaneous distance and equilibrium distance between the C $\alpha$  atoms  $i$  and  $j$ , respectively.  $H(x)$  is the Heaviside step function. When  $x > 0$ ,  $H(x) = 1$ ; Otherwise  $H(x) = 0$ . In our work,  $k$  and  $r_c$  adopt the empirical values of 100 kcal/(nm)<sup>2</sup> and 1.5 nm, respectively. When  $r_{ij} > r_c$ , there is no interaction between the C $\alpha$  atoms  $i$  and  $j$ . For ANM containing  $M$  C $\alpha$  atoms,  $3M-6$  eigenvectors are generated by normal mode analysis. These eigenvectors are used for the coarse-graining in ED-CG or the evaluation of distance fluctuations used in FM-CG.

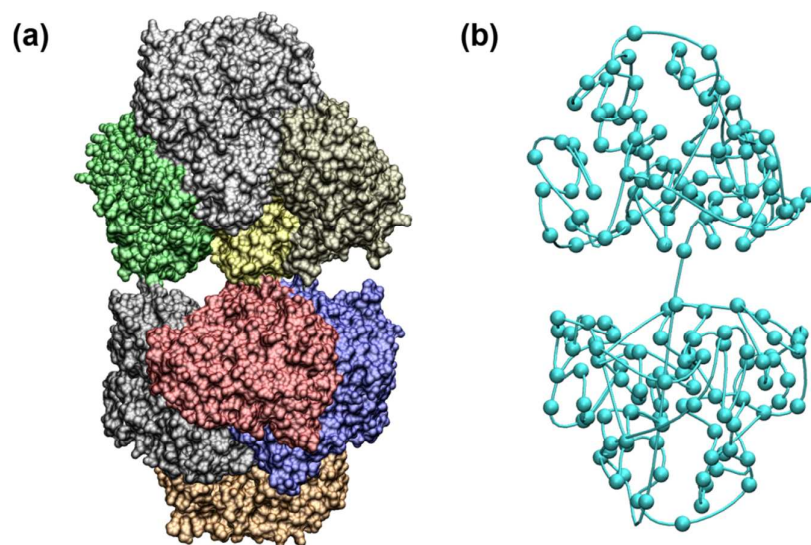

**Figure S1** (a) The contour map of the all-atom model of Formolase protein (PDB 4QPZ) with 4497 residues. (b) The optimal 181 CG sites derived by SLIO based on ED-CG at the time cost of 2.4 seconds.

**Table S1.** Optimized values of  $\chi^2$  (nm<sup>2</sup>) by SASD and SOBC based on ED-CG for F-actin with the CG number  $N = 4$ . The samplings of SASD and SOBC are 100, while SLIO performs only once with the value 82.958308 nm<sup>2</sup> obtained. The optimal values of SASD and SOBC are 84.722629 and 82.958683 nm<sup>2</sup>, respectively.

**Results of SASD:**

| $\chi^2_{\text{SASD}}$ (nm <sup>2</sup> ) |           |           |            |           |
|-------------------------------------------|-----------|-----------|------------|-----------|
| 89.808226                                 | 94.211313 | 95.562618 | 92.270700  | 94.895964 |
| 91.045174                                 | 93.947219 | 93.439861 | 95.875256  | 95.546767 |
| 89.861590                                 | 93.730051 | 88.092014 | 87.026986  | 86.869723 |
| 93.425717                                 | 88.809727 | 87.840673 | 92.469413  | 96.114167 |
| 90.565028                                 | 93.878252 | 90.956111 | 90.385555  | 92.330416 |
| 87.476881                                 | 94.166396 | 93.481424 | 94.881853  | 91.979100 |
| 96.258870                                 | 90.230059 | 97.227651 | 89.872963  | 92.102583 |
| 92.224629                                 | 92.327777 | 93.649151 | 95.900138  | 90.187839 |
| 87.705686                                 | 95.042634 | 91.017615 | 100.763582 | 91.776656 |
| 93.353101                                 | 84.722629 | 97.312729 | 89.152472  | 97.450517 |
| 95.863463                                 | 91.841703 | 98.266525 | 94.297916  | 92.536582 |
| 92.333974                                 | 86.968455 | 95.563620 | 95.034926  | 89.467820 |
| 92.641051                                 | 94.593792 | 95.247934 | 94.068368  | 88.611423 |
| 92.772178                                 | 95.364367 | 91.658780 | 97.182721  | 84.722629 |
| 85.824775                                 | 96.398809 | 95.911638 | 85.463245  | 94.344740 |
| 91.750514                                 | 87.623170 | 93.538861 | 94.050640  | 91.096140 |
| 89.420799                                 | 93.177133 | 85.339832 | 90.776770  | 94.057826 |
| 93.285402                                 | 88.023774 | 90.897943 | 96.012150  | 88.961745 |
| 94.546844                                 | 96.532384 | 88.040830 | 96.467800  | 93.231397 |
| 91.779362                                 | 91.178068 | 89.496630 | 85.583636  | 94.548622 |

**Results of SOBC:**

| $\chi^2_{\text{SOBC}} (\text{nm}^2)$ |           |           |           |           |
|--------------------------------------|-----------|-----------|-----------|-----------|
| 85.685299                            | 85.728465 | 83.146230 | 88.521408 | 89.246474 |
| 89.002393                            | 83.270981 | 90.614003 | 84.110614 | 89.320758 |
| 88.723320                            | 83.992084 | 92.759306 | 86.510129 | 83.615513 |
| 91.646134                            | 91.629505 | 88.146170 | 88.018341 | 82.958683 |
| 89.275418                            | 87.863836 | 87.221481 | 92.111703 | 83.601150 |
| 89.007621                            | 83.668183 | 84.086510 | 85.184588 | 87.215276 |
| 87.557487                            | 88.877657 | 89.445404 | 95.058621 | 94.937346 |
| 86.848383                            | 90.012111 | 83.857571 | 84.930223 | 93.852160 |
| 83.577801                            | 83.718436 | 83.314077 | 90.041934 | 92.159442 |
| 88.494590                            | 85.690390 | 92.946934 | 92.631321 | 85.870463 |
| 87.259617                            | 87.412423 | 95.608812 | 90.356861 | 88.341180 |
| 84.155757                            | 85.532280 | 82.976035 | 84.347394 | 85.901304 |
| 92.611789                            | 86.149543 | 87.912743 | 83.823700 | 92.415069 |
| 84.918394                            | 84.803603 | 92.757755 | 87.534998 | 89.093351 |
| 87.851806                            | 87.815916 | 87.705643 | 83.339770 | 89.012362 |
| 90.167817                            | 84.166282 | 87.449007 | 91.026705 | 84.939740 |
| 86.414106                            | 91.812152 | 90.577712 | 86.530481 | 92.281292 |
| 89.485595                            | 85.976164 | 86.027175 | 85.496629 | 84.889453 |
| 87.444966                            | 88.788842 | 90.104843 | 86.149957 | 91.052835 |
| 89.235177                            | 88.103428 | 85.264507 | 86.310972 | 86.371548 |
